# Supplementary material
Source: PubMed Central journal article supplement (PMC5886210)
Supplement: ddx371_hmg-2017-twb-00591.pdf [file ddx371_hmg-2017-twb-00591.pdf]

**Supplemental Figure 1. Paucity of  $\alpha$ S inclusions in non-motor impaired M83 mice injected in the gastrocnemius muscle with E46K  $\alpha$ S fibrils.** Representative immunohistochemistry images of spinal cord (SC), brainstem and thalamus (Thal) of M83 mice injected intramuscularly with E46K  $\alpha$ S fibrils. Scale bars = 100 $\mu$ m for each respective region shown.

**Supplemental Figure 2. Representative images showing co-labeling with 9C10 and anti-p62 antibodies.** (A) Double immunofluorescence analysis in the brainstem of an M83 mice following injection in the gastrocnemius muscle with H50Q  $\alpha$ S fibrils antibodies 9C10 (green) and anti-p62 (red) or (B) in the cortex of an M20 mouse following injection in the hippocampus with H50Q  $\alpha$ S fibrils. Merged images with DAPI shown in the right panels. Scale bars = 100  $\mu$ m.

**Supplemental Figure 3.  $\alpha$ S inclusion pathology in M83 mice injected in the gastrocnemius muscle with wild-type and mutant  $\alpha$ S fibrils.** Representative immunohistochemistry images of the pons of M83 mice injected intramuscularly with wild-type, E46K, H50Q, G51D or A53E  $\alpha$ S fibrils stained with anti-human  $\alpha$ S antibody Syn 211 or N-terminal specific antibody Syn 506. Scale bars = 100  $\mu$ m.

**Supplemental Figure 4. Thioflavin S and argyrophilic  $\alpha$ S inclusions following induction of aggregation with  $\alpha$ S fibrils.** (A, B) Representative inclusions stained with Thioflavin S in an M83 mouse following intramuscular injection with H50Q  $\alpha$ S fibrils (A) and an M20 mouse following intrahippocampal injection with H50Q  $\alpha$ S fibrils (B). (C, D) Campbell-Switzer silver stained inclusions in an M83 mouse following intramuscular injection with H50Q  $\alpha$ S fibrils (C) and an M20 mouse following intrahippocampal injection with wild-type  $\alpha$ S fibrils (D). Arrows depict stained inclusions. Scale bars = 100  $\mu$ m or 50  $\mu$ m (inset).

**Supplemental Figure 5.  $\alpha$ S inclusion pathology in M20 mice following intrahippocampal injection of human wild-type, H50Q, G51D or A53E  $\alpha$ S mutant  $\alpha$ S fibrils demonstrated by 9C10 immunohistochemistry.** Representative 9C10 immunostaining images of the hippocampus (Hipp), entorhinal cortex (Ectx), thalamus (Thal), brainstem and spinal cord (SC) of M20 mice 2 months (A) or 4 months (B) post-intrahippocampal injection of human wild-type, H50Q, G51D or A53E  $\alpha$ S fibrils. Scale bars = 50  $\mu$ m.

**Supplemental Figure 6.  $\alpha$ S inclusion pathology in M20 mice following intrahippocampal injection of human wild-type, H50Q, G51D or A53E  $\alpha$ S mutant  $\alpha$ S fibrils demonstrated by p62 immunohistochemistry.** Representative p62 immunostaining images of the hippocampus (Hipp), entorhinal cortex (Ectx), thalamus (Thal), brainstem and spinal cord (SC) of M20 mice 2 months (A) or 4

months (B) post-intrahippocampal injection of human wild-type, H50Q, G51D or A53E  $\alpha$ S fibrils. Scale bars = 50  $\mu$ m.

**Supplemental Figure 7.  $\alpha$ S inclusion pathology in M20 mice following intrahippocampal injection of E46K mutant  $\alpha$ S fibrils demonstrated by 9C10 immunohistochemistry.** Representative 9C10 immunostaining images of the hippocampus (Hipp), entorhinal cortex (Ectx), thalamus (Thal), brainstem and spinal cord (SC) of M20 mice 4, 6 or 8 months post-intrahippocampal injection of E46K  $\alpha$ S fibrils. Scale bars = 50  $\mu$ m. NP = no pathology present (n = 3), P = pathology present (n = 1).

**Supplemental Figure 8.  $\alpha$ S inclusion pathology in M20 mice following intrahippocampal injection of E46K mutant  $\alpha$ S fibrils demonstrated by p62 immunohistochemistry.** Representative p62 immunostaining images of the hippocampus (Hipp), entorhinal cortex (Ectx), thalamus (Thal), brainstem and spinal cord (SC) of M20 mice 4, 6 or 8 months post-intrahippocampal injection of E46K  $\alpha$ S fibrils. Scale bars = 50  $\mu$ m. NP = no pathology present (n = 3), P = pathology present (n = 1).

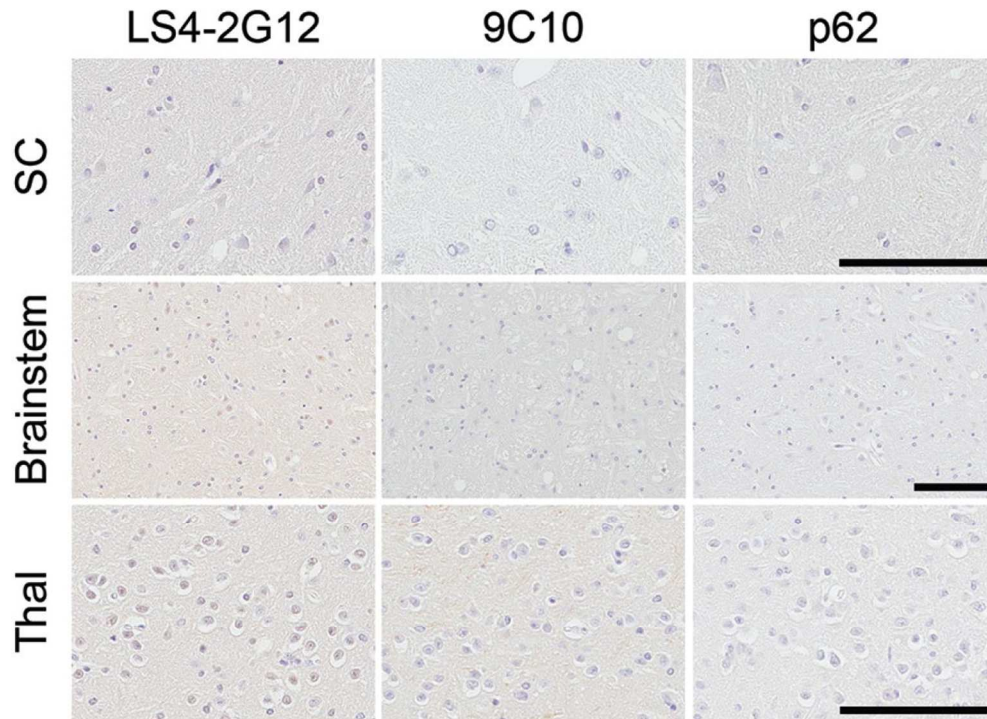

Supplemental Figure 1. Paucity of  $\alpha$ S inclusions in non-motor impaired M83 mice injected in the gastrocnemius muscle with E46K  $\alpha$ S fibrils. Representative immunohistochemistry images of spinal cord (SC), brainstem and thalamus (Thal) of M83 mice injected intramuscularly with E46K  $\alpha$ S fibrils. Scale bars = 100 $\mu$ m for each respective region shown.

346x251mm (96 x 96 DPI)

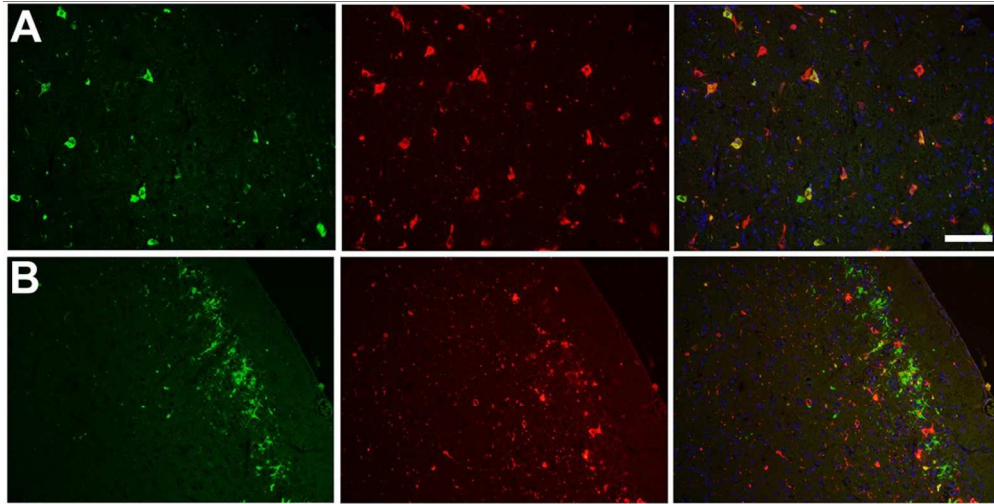

Supplemental Figure 2. Representative images showing co-labeling with 9C10 and anti-p62 antibodies. (A) Double immunofluorescence analysis in the brainstem of an M83 mice following injection in the gastrocnemius muscle with H50Q  $\alpha$ S fibrils antibodies 9C10 (green) and anti-p62 (red) or (B) in the cortex of an M20 mouse following injection in the hippocampus with H50Q  $\alpha$ S fibrils. Merged images with DAPI shown in the right panels. Scale bars = 100  $\mu$ m.

490x247mm (96 x 96 DPI)

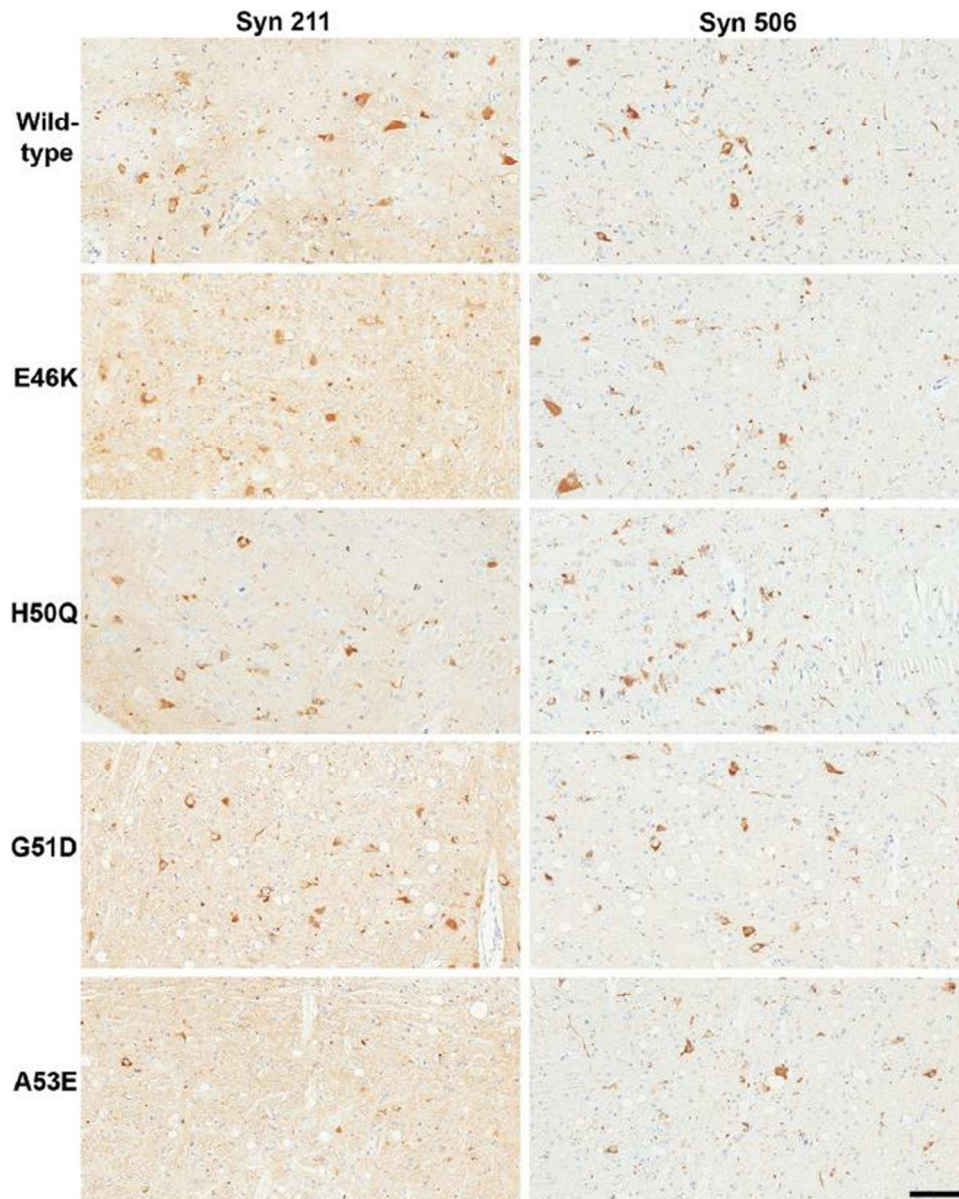

Supplemental Figure 3.  $\alpha$ S inclusion pathology in M83 mice injected in the gastrocnemius muscle with wild-type and mutant  $\alpha$ S fibrils. Representative immunohistochemistry images of the pons of M83 mice injected intramuscularly with wild-type, E46K, H50Q, G51D or A53E  $\alpha$ S fibrils stained with anti-human  $\alpha$ S antibody Syn 211 or N-terminal specific antibody Syn 506. Scale bars = 100  $\mu$ m.

174x217mm (96 x 96 DPI)

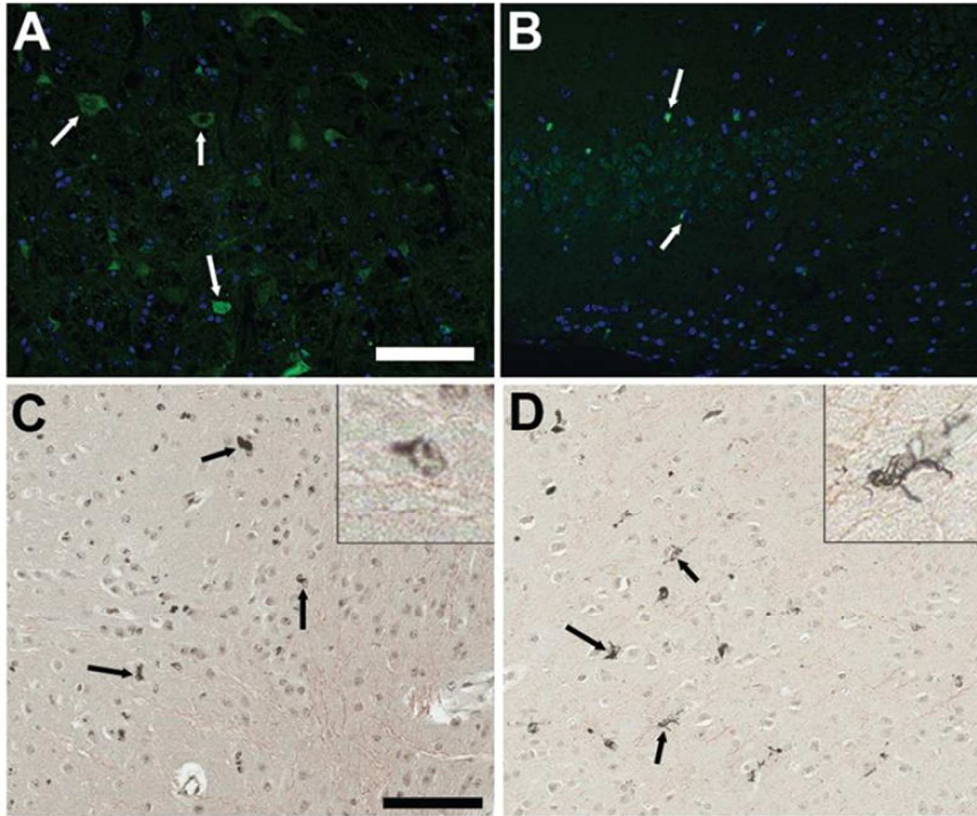

Supplemental Figure 4. Thioflavin S and argyrophilic  $\alpha$ S inclusions following induction of aggregation with  $\alpha$ S fibrils. (A, B) Representative inclusions stained with Thioflavin S in an M83 mouse following intramuscular injection with H50Q  $\alpha$ S fibrils (A) and an M20 mouse following intrahippocampal injection with H50Q  $\alpha$ S fibrils (B). (C, D) Campbell-Switzer silver stained inclusions in an M83 mouse following intramuscular injection with H50Q  $\alpha$ S fibrils (C) and an M20 mouse following intrahippocampal injection with wild-type  $\alpha$ S fibrils (D). Arrows depict stained inclusions. Scale bars = 100  $\mu$ m or 50  $\mu$ m (inset).

216x177mm (96 x 96 DPI)

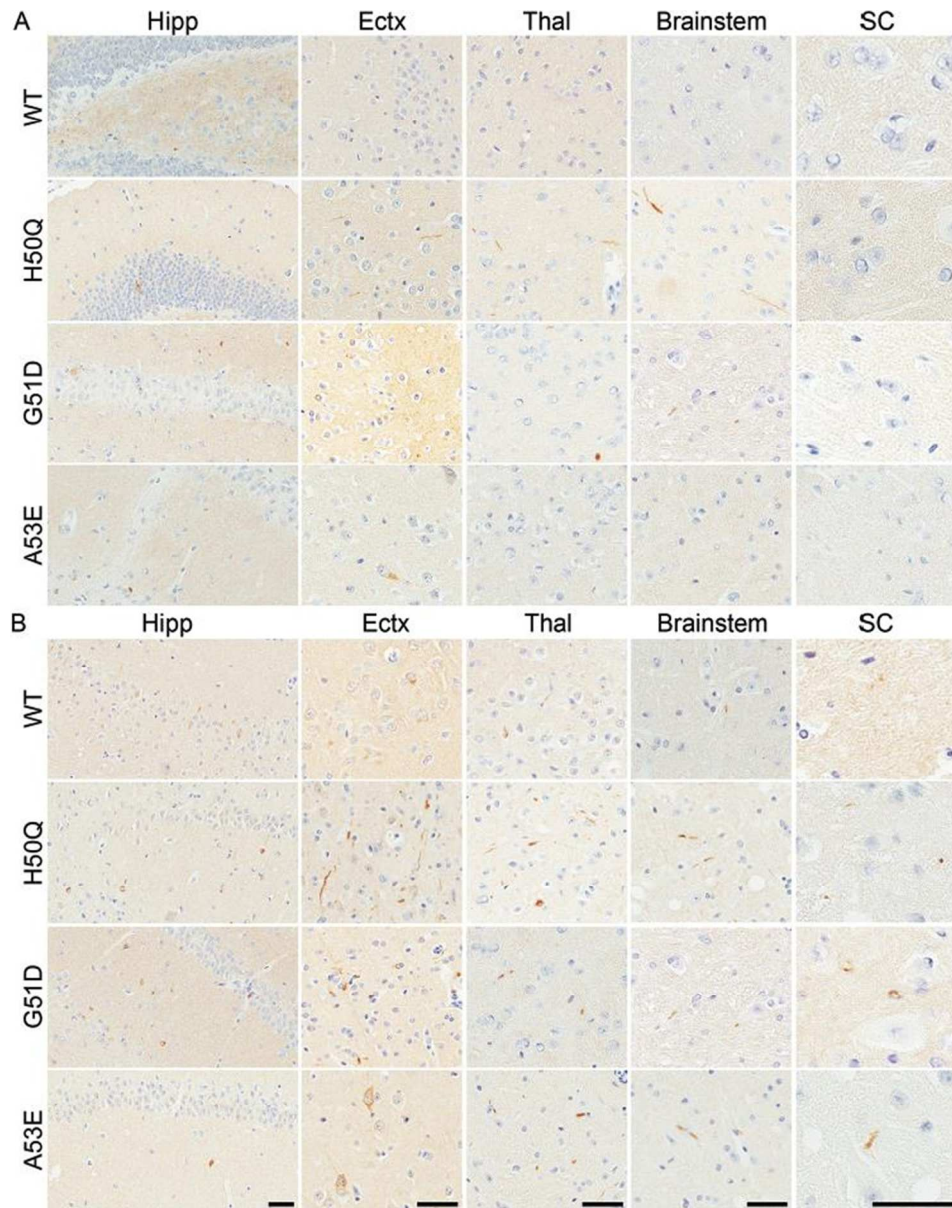

Supplemental Figure 5.  $\alpha$ S inclusion pathology in M20 mice following intrahippocampal injection of human wild-type, H50Q, G51D or A53E  $\alpha$ S mutant  $\alpha$ S fibrils demonstrated by 9C10 immunohistochemistry. Representative 9C10 immunostaining images of the hippocampus (Hipp), entorhinal cortex (Ectx), thalamus (Thal), brainstem and spinal cord (SC) of M20 mice 2 months (A) or 4 months (B) post-intrahippocampal injection of human wild-type, H50Q, G51D or A53E  $\alpha$ S fibrils. Scale bars = 50  $\mu$ m.

198x251mm (96 x 96 DPI)



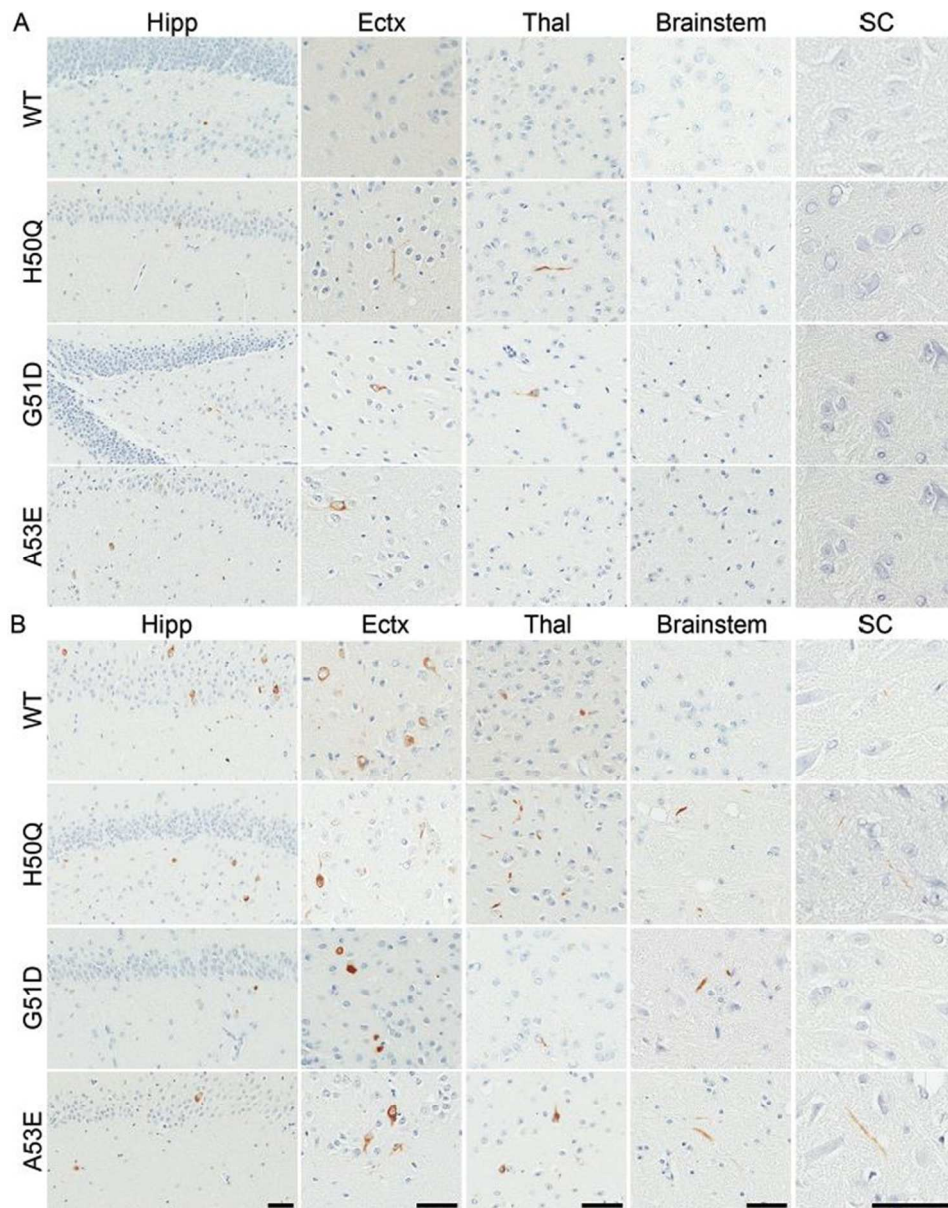

Supplemental Figure 6. αS inclusion pathology in M20 mice following intrahippocampal injection of human wild-type, H50Q, G51D or A53E αS mutant αS fibrils demonstrated by p62 immunohistochemistry. Representative p62 immunostaining images of the hippocampus (Hipp), entorhinal cortex (Ectx), thalamus (Thal), brainstem and spinal cord (SC) of M20 mice 2 months (A) or 4 months (B) post-intrahippocampal injection of human wild-type, H50Q, G51D or A53E αS fibrils. Scale bars = 50 μm.

198x251mm (96 x 96 DPI)

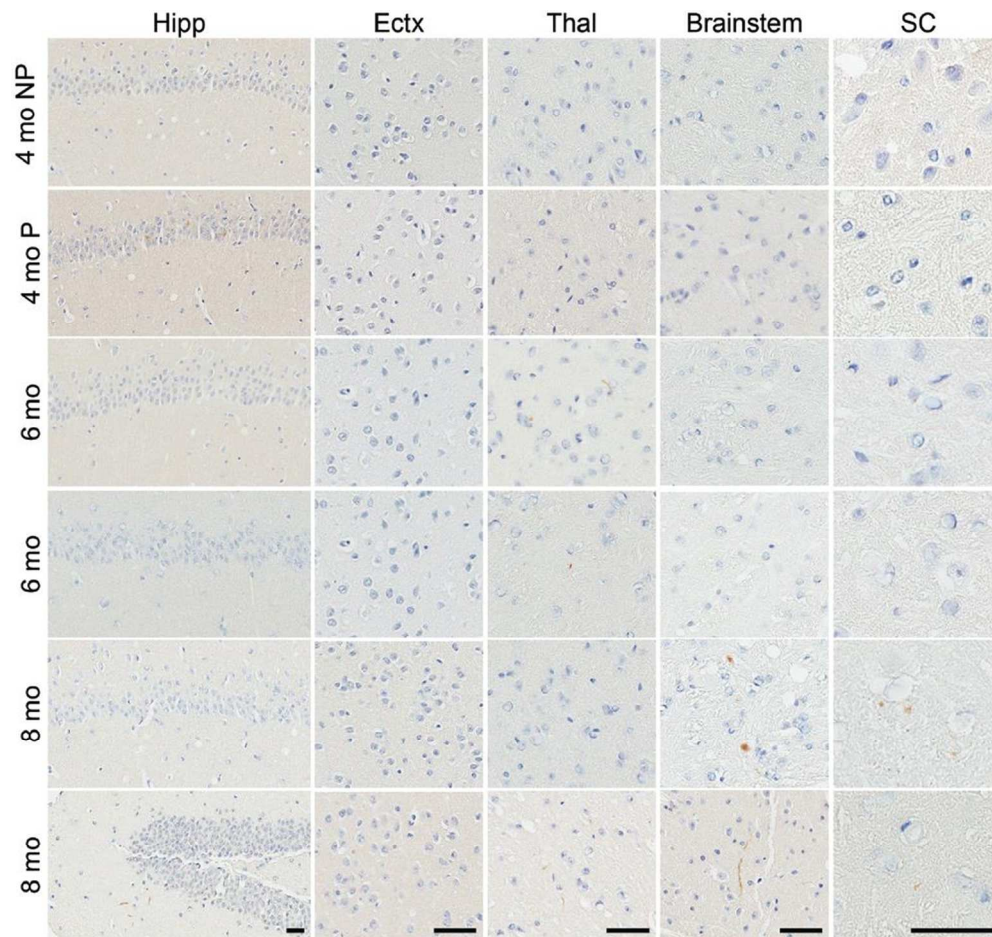

Supplemental Figure 7.  $\alpha$ S inclusion pathology in M20 mice following intrahippocampal injection of E46K mutant  $\alpha$ S fibrils demonstrated by 9C10 immunohistochemistry. Representative 9C10 immunostaining images of the hippocampus (Hipp), entorhinal cortex (Ectx), thalamus (Thal), brainstem and spinal cord (SC) of M20 mice 4, 6 or 8 months post-intrahippocampal injection of E46K  $\alpha$ S fibrils. Scale bars = 50  $\mu$ m. NP = no pathology present (n = 3), P = pathology present (n = 1).

267x251mm (96 x 96 DPI)

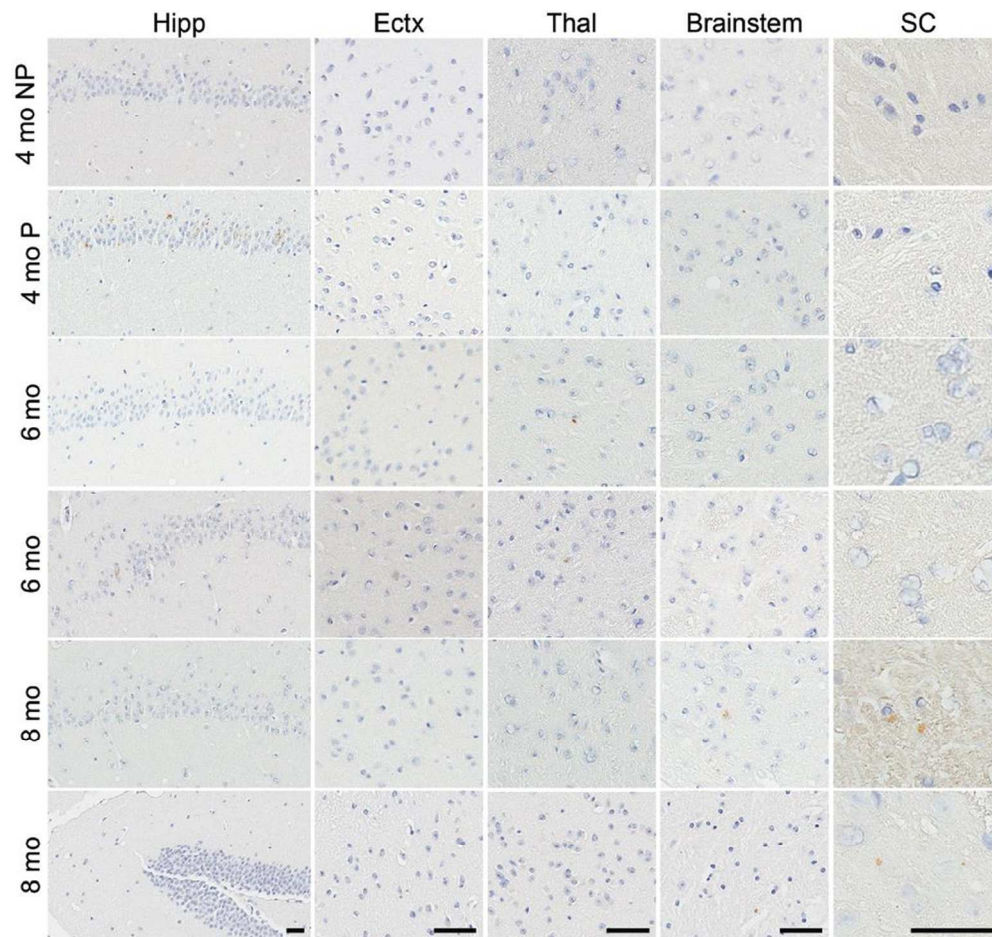

Supplemental Figure 8.  $\alpha$ S inclusion pathology in M20 mice following intrahippocampal injection of E46K mutant  $\alpha$ S fibrils demonstrated by p62 immunohistochemistry. Representative p62 immunostaining images of the hippocampus (Hipp), entorhinal cortex (Ectx), thalamus (Thal), brainstem and spinal cord (SC) of M20 mice 4, 6 or 8 months post-intrahippocampal injection of E46K  $\alpha$ S fibrils. Scale bars = 50  $\mu$ m. NP = no pathology present (n = 3), P = pathology present (n = 1).

267x251mm (96 x 96 DPI)
